# Supplementary material
Source: publisher figshare collection journal article supplement (https://acs.figshare.com/ndownloader/files/5334532)
Supplement: Supplementary file 1 [file 5334532]

data_global


_publ_contact_author_name         'Martin Lutz'
_publ_contact_author_address
; Bijvoet Center for Biomolecular Research
  Crystal and Structural Chemistry
  Utrecht University
  Padualaan 8
  3584 CH Utrecht
  The Netherlands
;
_publ_contact_author_email        'm.lutz@chem.uu.nl'
_publ_contact_author_fax          '[+31] 30 2533940'
_publ_contact_author_phone        '[+31] 30 2533902'

_publ_section_title
;
A New Crystal Structure: MgSO~4~.11H~2~O
-Crystallization and Characterization-
;

loop_
_publ_author_name
_publ_author_address
  'Genceli, F. E.'
;  Laboratory for Process Equipment
   Delft University of Technology
   Leeghwaterstraat 44
   2628 CA Delft
   The Netherlands
;
  'Lutz, M.'
;  Bijvoet Center for Biomolecular Research
   Crystal and Structural Chemistry
   Utrecht University
   Padualaan 8
   3584 CH Utrecht
   The Netherlands
;
  'Spek, A. L.'
;  Bijvoet Center for Biomolecular Research
   Crystal and Structural Chemistry
   Utrecht University
   Padualaan 8
   3584 CH Utrecht
   The Netherlands
;
  'Witkamp, G. J.'
;  Laboratory for Process Equipment
   Delft University of Technology
   Leeghwaterstraat 44
   2628 CA Delft
   The Netherlands
;

 
data_s3572a 
 
_audit_creation_method            SHELXL-97 
_chemical_name_systematic 
; 
 ? 
; 
_chemical_name_common             ? 
_chemical_melting_point           ? 
_chemical_formula_moiety
 'H12 Mg O6, O4 S, 5(H2 O)'
_chemical_formula_sum 
 'H22 Mg O15 S' 
_chemical_formula_weight          318.55 
 
loop_ 
 _atom_type_symbol 
 _atom_type_description 
 _atom_type_scat_dispersion_real 
 _atom_type_scat_dispersion_imag 
 _atom_type_scat_source 
 'H'  'H'   0.0000   0.0000 
 'International Tables Vol C Tables 4.2.6.8 and 6.1.1.4' 
 'Mg'  'Mg'   0.0486   0.0363 
 'International Tables Vol C Tables 4.2.6.8 and 6.1.1.4' 
 'O'  'O'   0.0106   0.0060 
 'International Tables Vol C Tables 4.2.6.8 and 6.1.1.4' 
 'S'  'S'   0.1246   0.1234 
 'International Tables Vol C Tables 4.2.6.8 and 6.1.1.4' 
 
_symmetry_cell_setting            triclinic
_symmetry_space_group_name_H-M    'P -1'
_symmetry_space_group_name_Hall   '-P 1'
 
loop_ 
 _symmetry_equiv_pos_as_xyz 
 'x, y, z' 
 '-x, -y, -z' 
 
_cell_length_a                    6.72548(7) 
_cell_length_b                    6.77937(14) 
_cell_length_c                    17.2898(5) 
_cell_angle_alpha                 88.255(1) 
_cell_angle_beta                  89.478(2) 
_cell_angle_gamma                 62.598(1) 
_cell_volume                      699.54(3) 
_cell_formula_units_Z             2 
_cell_measurement_temperature     110(2) 
_cell_measurement_reflns_used     21622
_cell_measurement_theta_min       2.36
_cell_measurement_theta_max       39.98
 
_exptl_crystal_description        needle
_exptl_crystal_colour             colourless
_exptl_crystal_size_max           0.54
_exptl_crystal_size_mid           0.24
_exptl_crystal_size_min           0.18
_exptl_crystal_density_meas       ? 
_exptl_crystal_density_diffrn     1.512 
_exptl_crystal_density_method     'not measured' 
_exptl_crystal_F_000              340 
_exptl_absorpt_coefficient_mu     0.343 
_exptl_absorpt_correction_type    'multi-scan'
_exptl_absorpt_correction_T_min   0.83
_exptl_absorpt_correction_T_max   0.94
_exptl_absorpt_process_details    ? 
 
_exptl_special_details 
; 
 ? 
; 
 
_diffrn_ambient_temperature       110(2) 
_diffrn_radiation_wavelength      0.71073 
_diffrn_radiation_type            MoK\a 
_diffrn_radiation_source          'rotating anode' 
_diffrn_radiation_monochromator   graphite 
_diffrn_measurement_device_type   'Nonius KappaCCD'
_diffrn_measurement_method        ? 
_diffrn_detector_area_resol_mean  ? 
_diffrn_standards_number          ? 
_diffrn_standards_interval_count  ? 
_diffrn_standards_interval_time   ? 
_diffrn_standards_decay_%         ? 
_diffrn_reflns_number             40989 
_diffrn_reflns_av_R_equivalents   0.0187 
_diffrn_reflns_av_sigmaI/netI     0.0165 
_diffrn_reflns_limit_h_min        -12 
_diffrn_reflns_limit_h_max        12 
_diffrn_reflns_limit_k_min        -12 
_diffrn_reflns_limit_k_max        12 
_diffrn_reflns_limit_l_min        -31 
_diffrn_reflns_limit_l_max        31 
_diffrn_reflns_theta_min          2.36 
_diffrn_reflns_theta_max          40.00 
_reflns_number_total              8564 
_reflns_number_gt                 7341 
_reflns_threshold_expression      'I>2\s(I)'
 
_computing_data_collection        'Nonius COLLECT'
_computing_cell_refinement        'Peakref'
_computing_data_reduction         'EvalCCD, Sadabs'
_computing_structure_solution     'coordinates taken from s3524a' 
_computing_structure_refinement   'SHELXL-97 (Sheldrick, 1997)' 
_computing_molecular_graphics     ? 
_computing_publication_material   ? 
 
_refine_special_details 
; 
 Refinement of F^2^ against ALL reflections.  The weighted R-factor wR and 
 goodness of fit S are based on F^2^, conventional R-factors R are based 
 on F, with F set to zero for negative F^2^. The threshold expression of 
 F^2^ > 2sigma(F^2^) is used only for calculating R-factors(gt) etc. and is 
 not relevant to the choice of reflections for refinement.  R-factors based 
 on F^2^ are statistically about twice as large as those based on F, and R- 
 factors based on ALL data will be even larger. 
; 
 
_refine_ls_structure_factor_coef  Fsqd  
_refine_ls_matrix_type            full 
_refine_ls_weighting_scheme       calc  
_refine_ls_weighting_details 
 'calc w=1/[\s^2^(Fo^2^)+(0.0245P)^2^+0.1018P] where P=(Fo^2^+2Fc^2^)/3' 
_atom_sites_solution_primary      direct 
_atom_sites_solution_secondary    difmap 
_atom_sites_solution_hydrogens    difmap 
_refine_ls_hydrogen_treatment     refall 
_refine_ls_extinction_method      none 
_refine_ls_extinction_coef        ? 
_refine_ls_number_reflns          8564 
_refine_ls_number_parameters      245 
_refine_ls_number_restraints      0 
_refine_ls_R_factor_all           0.0313 
_refine_ls_R_factor_gt            0.0222 
_refine_ls_wR_factor_ref          0.0577 
_refine_ls_wR_factor_gt           0.0545 
_refine_ls_goodness_of_fit_ref    1.084 
_refine_ls_restrained_S_all       1.084 
_refine_ls_shift/su_max           0.002 
_refine_ls_shift/su_mean          0.000 
 
loop_ 
 _atom_site_label 
 _atom_site_type_symbol 
 _atom_site_fract_x 
 _atom_site_fract_y 
 _atom_site_fract_z 
 _atom_site_U_iso_or_equiv 
 _atom_site_adp_type 
 _atom_site_occupancy 
 _atom_site_symmetry_multiplicity 
 _atom_site_calc_flag 
 _atom_site_refinement_flags 
 _atom_site_disorder_assembly 
 _atom_site_disorder_group 
Mg1 Mg 0.5000 0.5000 0.5000 0.00915(4) Uani 1 2 d S . . 
O5 O 0.69292(8) 0.65636(8) 0.51415(3) 0.01877(8) Uani 1 1 d . . . 
O6 O 0.25677(7) 0.78302(7) 0.44616(2) 0.01570(7) Uani 1 1 d . . . 
O7 O 0.34760(7) 0.61051(7) 0.60556(2) 0.01411(6) Uani 1 1 d . . . 
Mg2 Mg 0.5000 0.5000 0.0000 0.00959(4) Uani 1 2 d S . . 
O8 O 0.54718(7) 0.61040(7) 0.10526(2) 0.01496(7) Uani 1 1 d . . . 
O9 O 0.84191(7) 0.32672(8) -0.00835(2) 0.01639(7) Uani 1 1 d . . . 
O10 O 0.50975(7) 0.76791(7) -0.05533(3) 0.01601(7) Uani 1 1 d . . . 
S1 S 0.905021(18) 0.819975(19) 0.200828(6) 0.00808(2) Uani 1 1 d . . . 
O1 O 1.05536(7) 0.92210(8) 0.20022(2) 0.01731(7) Uani 1 1 d . . . 
O2 O 1.03068(7) 0.58380(6) 0.22688(2) 0.01449(6) Uani 1 1 d . . . 
O3 O 0.71799(6) 0.93724(7) 0.25500(2) 0.01479(7) Uani 1 1 d . . . 
O4 O 0.81602(6) 0.83061(6) 0.12239(2) 0.01223(6) Uani 1 1 d . . . 
O11 O 0.10574(7) 0.25212(7) 0.11957(2) 0.01474(6) Uani 1 1 d . . . 
O12 O 0.81108(7) 0.90311(7) 0.41287(2) 0.01430(6) Uani 1 1 d . . . 
O13 O 0.93790(7) 0.64731(7) 0.63973(2) 0.01423(6) Uani 1 1 d . . . 
O14 O 0.50358(7) 0.59099(7) 0.75372(2) 0.01453(6) Uani 1 1 d . . . 
O15 O 0.33110(7) 0.93827(7) 0.30774(2) 0.01528(7) Uani 1 1 d . . . 
H1 H 0.7197(19) 0.7294(19) 0.4813(7) 0.035(3) Uiso 1 1 d . . . 
H2 H 0.771(2) 0.645(2) 0.5503(8) 0.042(3) Uiso 1 1 d . . . 
H3 H 0.126(2) 0.8063(19) 0.4387(7) 0.035(3) Uiso 1 1 d . . . 
H4 H 0.2899(19) 0.8260(19) 0.4056(7) 0.033(3) Uiso 1 1 d . . . 
H5 H 0.4092(19) 0.5905(19) 0.6477(7) 0.033(3) Uiso 1 1 d . . . 
H6 H 0.218(2) 0.620(2) 0.6154(7) 0.044(3) Uiso 1 1 d . . . 
H7 H 0.610(2) 0.680(2) 0.1105(7) 0.036(3) Uiso 1 1 d . . . 
H8 H 0.5460(19) 0.5539(19) 0.1469(7) 0.033(3) Uiso 1 1 d . . . 
H9 H 0.9210(19) 0.3183(19) 0.0308(7) 0.033(3) Uiso 1 1 d . . . 
H10 H 0.928(2) 0.2735(19) -0.0448(7) 0.034(3) Uiso 1 1 d . . . 
H11 H 0.628(2) 0.7709(19) -0.0748(7) 0.035(3) Uiso 1 1 d . . . 
H12 H 0.407(2) 0.881(2) -0.0677(7) 0.034(3) Uiso 1 1 d . . . 
H13 H 0.061(2) 0.360(2) 0.1513(7) 0.041(3) Uiso 1 1 d . . . 
H14 H 0.093(2) 0.145(2) 0.1429(7) 0.040(3) Uiso 1 1 d . . . 
H15 H 0.756(2) 1.032(2) 0.4237(8) 0.045(3) Uiso 1 1 d . . . 
H16 H 0.7905(19) 0.9089(19) 0.3650(7) 0.033(3) Uiso 1 1 d . . . 
H17 H 0.856(2) 0.775(2) 0.6563(7) 0.036(3) Uiso 1 1 d . . . 
H18 H 0.960(2) 0.557(2) 0.6762(7) 0.040(3) Uiso 1 1 d . . . 
H19 H 0.640(2) 0.542(2) 0.7612(7) 0.038(3) Uiso 1 1 d . . . 
H20 H 0.4507(19) 0.722(2) 0.7600(7) 0.033(3) Uiso 1 1 d . . . 
H21 H 0.4496(19) 0.9183(18) 0.2869(6) 0.029(3) Uiso 1 1 d . . . 
H22 H 0.262(2) 0.913(2) 0.2755(7) 0.038(3) Uiso 1 1 d . . . 
 
loop_ 
 _atom_site_aniso_label 
 _atom_site_aniso_U_11 
 _atom_site_aniso_U_22 
 _atom_site_aniso_U_33 
 _atom_site_aniso_U_23 
 _atom_site_aniso_U_13 
 _atom_site_aniso_U_12 
Mg1 0.00929(9) 0.01054(10) 0.00801(9) 0.00005(7) -0.00021(7) -0.00491(8) 
O5 0.0257(2) 0.0283(2) 0.01306(15) 0.00521(14) -0.00555(14) -0.02185(18) 
O6 0.01184(14) 0.01722(17) 0.01533(16) 0.00582(13) -0.00141(12) -0.00471(13) 
O7 0.01251(14) 0.02093(17) 0.00885(13) -0.00137(12) 0.00072(11) -0.00762(13) 
Mg2 0.00922(9) 0.01098(10) 0.00877(9) 0.00083(7) -0.00040(7) -0.00488(8) 
O8 0.01888(16) 0.02095(18) 0.01018(14) -0.00067(13) -0.00003(12) -0.01355(15) 
O9 0.00998(14) 0.02432(19) 0.01072(14) -0.00153(13) 0.00019(11) -0.00429(13) 
O10 0.01224(15) 0.01346(16) 0.02128(18) 0.00620(13) -0.00009(13) -0.00540(13) 
S1 0.00804(4) 0.00866(4) 0.00779(4) 0.00080(3) -0.00032(3) -0.00410(3) 
O1 0.01872(17) 0.02319(19) 0.01792(17) 0.00431(14) -0.00342(13) -0.01663(16) 
O2 0.01619(15) 0.00976(14) 0.01386(15) 0.00338(11) -0.00150(12) -0.00304(12) 
O3 0.01242(14) 0.01663(16) 0.01243(14) -0.00252(12) 0.00378(11) -0.00416(13) 
O4 0.01339(14) 0.01422(15) 0.00869(13) 0.00074(11) -0.00250(11) -0.00603(12) 
O11 0.01619(16) 0.01509(16) 0.01454(15) 0.00180(13) -0.00066(12) -0.00869(13) 
O12 0.01645(16) 0.01300(15) 0.01303(15) 0.00027(12) 0.00012(12) -0.00646(13) 
O13 0.01564(15) 0.01589(16) 0.01121(14) 0.00149(12) -0.00010(12) -0.00741(13) 
O14 0.01404(15) 0.01445(16) 0.01342(15) -0.00074(12) -0.00089(12) -0.00509(13) 
O15 0.01469(15) 0.01949(17) 0.01329(15) 0.00002(13) -0.00019(12) -0.00927(14) 
 
_geom_special_details 
; 
 All esds (except the esd in the dihedral angle between two l.s. planes) 
 are estimated using the full covariance matrix.  The cell esds are taken 
 into account individually in the estimation of esds in distances, angles 
 and torsion angles; correlations between esds in cell parameters are only 
 used when they are defined by crystal symmetry.  An approximate (isotropic) 
 treatment of cell esds is used for estimating esds involving l.s. planes. 
; 
 
loop_ 
 _geom_bond_atom_site_label_1 
 _geom_bond_atom_site_label_2 
 _geom_bond_distance 
 _geom_bond_site_symmetry_2 
 _geom_bond_publ_flag 
Mg1 O5 2.0383(4) . ? 
Mg1 O5 2.0383(4) 2_666 ? 
Mg1 O6 2.0625(4) . ? 
Mg1 O6 2.0625(4) 2_666 ? 
Mg1 O7 2.0699(4) 2_666 ? 
Mg1 O7 2.0700(4) . ? 
O5 H1 0.815(12) . ? 
O5 H2 0.797(13) . ? 
O6 H3 0.831(12) . ? 
O6 H4 0.819(12) . ? 
O7 H5 0.819(12) . ? 
O7 H6 0.858(13) . ? 
Mg2 O9 2.0510(4) 2_665 ? 
Mg2 O9 2.0510(4) . ? 
Mg2 O10 2.0545(4) . ? 
Mg2 O10 2.0545(4) 2_665 ? 
Mg2 O8 2.0700(4) 2_665 ? 
Mg2 O8 2.0701(4) . ? 
O8 H7 0.769(12) . ? 
O8 H8 0.807(12) . ? 
O9 H9 0.849(12) . ? 
O9 H10 0.823(12) . ? 
O10 H11 0.869(12) . ? 
O10 H12 0.785(12) . ? 
S1 O1 1.4648(4) . ? 
S1 O4 1.4737(4) . ? 
S1 O3 1.4816(4) . ? 
S1 O2 1.4827(4) . ? 
O11 H13 0.865(13) . ? 
O11 H14 0.856(13) . ? 
O12 H15 0.803(14) . ? 
O12 H16 0.837(12) . ? 
O13 H17 0.842(13) . ? 
O13 H18 0.829(13) . ? 
O14 H19 0.829(13) . ? 
O14 H20 0.799(12) . ? 
O15 H21 0.826(11) . ? 
O15 H22 0.800(13) . ? 
 
loop_ 
 _geom_angle_atom_site_label_1 
 _geom_angle_atom_site_label_2 
 _geom_angle_atom_site_label_3 
 _geom_angle 
 _geom_angle_site_symmetry_1 
 _geom_angle_site_symmetry_3 
 _geom_angle_publ_flag 
O5 Mg1 O5 180.0 . 2_666 ? 
O5 Mg1 O6 89.989(18) . . ? 
O5 Mg1 O6 90.012(18) 2_666 . ? 
O5 Mg1 O6 90.011(18) . 2_666 ? 
O5 Mg1 O6 89.988(18) 2_666 2_666 ? 
O6 Mg1 O6 180.000(1) . 2_666 ? 
O5 Mg1 O7 89.208(18) . 2_666 ? 
O5 Mg1 O7 90.791(18) 2_666 2_666 ? 
O6 Mg1 O7 90.175(17) . 2_666 ? 
O6 Mg1 O7 89.825(17) 2_666 2_666 ? 
O5 Mg1 O7 90.791(18) . . ? 
O5 Mg1 O7 89.210(18) 2_666 . ? 
O6 Mg1 O7 89.827(17) . . ? 
O6 Mg1 O7 90.173(17) 2_666 . ? 
O7 Mg1 O7 179.998(1) 2_666 . ? 
Mg1 O5 H1 126.2(8) . . ? 
Mg1 O5 H2 127.2(9) . . ? 
H1 O5 H2 106.0(12) . . ? 
Mg1 O6 H3 124.3(8) . . ? 
Mg1 O6 H4 117.7(8) . . ? 
H3 O6 H4 103.6(11) . . ? 
Mg1 O7 H5 127.1(8) . . ? 
Mg1 O7 H6 120.9(8) . . ? 
H5 O7 H6 105.1(11) . . ? 
O9 Mg2 O9 180.0 2_665 . ? 
O9 Mg2 O10 90.655(17) 2_665 . ? 
O9 Mg2 O10 89.346(17) . . ? 
O9 Mg2 O10 89.345(17) 2_665 2_665 ? 
O9 Mg2 O10 90.654(17) . 2_665 ? 
O10 Mg2 O10 180.0 . 2_665 ? 
O9 Mg2 O8 87.603(17) 2_665 2_665 ? 
O9 Mg2 O8 92.397(17) . 2_665 ? 
O10 Mg2 O8 90.055(18) . 2_665 ? 
O10 Mg2 O8 89.948(18) 2_665 2_665 ? 
O9 Mg2 O8 92.397(17) 2_665 . ? 
O9 Mg2 O8 87.603(17) . . ? 
O10 Mg2 O8 89.945(18) . . ? 
O10 Mg2 O8 90.052(18) 2_665 . ? 
O8 Mg2 O8 180.0 2_665 . ? 
Mg2 O8 H7 124.3(9) . . ? 
Mg2 O8 H8 125.1(8) . . ? 
H7 O8 H8 107.1(12) . . ? 
Mg2 O9 H9 118.6(8) . . ? 
Mg2 O9 H10 133.4(8) . . ? 
H9 O9 H10 107.4(11) . . ? 
Mg2 O10 H11 126.0(8) . . ? 
Mg2 O10 H12 127.0(8) . . ? 
H11 O10 H12 106.6(11) . . ? 
O1 S1 O4 110.03(2) . . ? 
O1 S1 O3 109.77(3) . . ? 
O4 S1 O3 109.84(2) . . ? 
O1 S1 O2 109.38(3) . . ? 
O4 S1 O2 108.93(2) . . ? 
O3 S1 O2 108.87(2) . . ? 
H13 O11 H14 107.2(11) . . ? 
H15 O12 H16 103.0(12) . . ? 
H17 O13 H18 107.3(11) . . ? 
H19 O14 H20 105.3(11) . . ? 
H21 O15 H22 105.6(11) . . ? 
 
loop_ 
 _geom_hbond_atom_site_label_D 
 _geom_hbond_atom_site_label_H 
 _geom_hbond_atom_site_label_A 
 _geom_hbond_distance_DH 
 _geom_hbond_distance_HA 
 _geom_hbond_distance_DA 
 _geom_hbond_angle_DHA 
 _geom_hbond_site_symmetry_A 
O5 H1 O12  0.815(12) 1.932(12) 2.7416(6) 172.5(12) . 
O5 H2 O13  0.797(13) 1.926(13) 2.7197(6) 174.1(13) . 
O6 H3 O12  0.831(12) 1.957(12) 2.7813(6) 171.2(12) 1_455 
O6 H4 O15  0.819(12) 1.904(12) 2.7192(6) 173.3(11) . 
O7 H5 O14  0.819(12) 1.945(12) 2.7534(6) 169.2(11) . 
O7 H6 O13  0.858(13) 1.854(13) 2.7111(6) 178.0(13) 1_455 
O8 H7 O4  0.769(12) 2.082(12) 2.8472(6) 172.9(12) . 
O8 H8 O14  0.807(12) 2.053(12) 2.8524(6) 170.6(11) 2_666 
O9 H9 O11  0.849(12) 1.892(12) 2.7337(6) 170.9(11) 1_655 
O9 H10 O4  0.823(12) 2.039(12) 2.8469(6) 166.8(11) 2_765 
O10 H11 O11  0.869(12) 1.886(12) 2.7520(6) 174.4(11) 2_665 
O10 H12 O4  0.785(12) 2.044(12) 2.8139(6) 166.5(11) 2_675 
O11 H13 O2  0.865(13) 1.969(13) 2.8188(6) 167.1(12) 1_455 
O11 H14 O1  0.856(13) 1.896(13) 2.7502(6) 176.0(12) 1_445 
O12 H15 O6  0.803(14) 2.591(14) 3.1748(6) 130.8(12) 2_676 
O12 H15 O7  0.803(14) 2.236(14) 2.9692(6) 151.9(13) 2_676 
O12 H16 O3  0.837(12) 1.949(12) 2.7847(6) 175.6(11) . 
O13 H17 O15  0.842(13) 1.886(13) 2.7274(6) 178.9(12) 2_676 
O13 H18 O2  0.829(13) 1.891(13) 2.7023(5) 165.9(12) 2_766 
O14 H19 O2  0.829(13) 1.984(13) 2.8119(6) 176.6(12) 2_766 
O14 H20 O3  0.799(12) 2.063(12) 2.8391(6) 163.9(11) 2_676 
O15 H21 O3  0.826(11) 1.941(11) 2.7464(6) 164.6(11) . 
O15 H22 O1  0.800(13) 1.891(13) 2.6775(6) 167.2(12) 1_455 
 
_diffrn_measured_fraction_theta_max    0.987 
_diffrn_reflns_theta_full              40.00 
_diffrn_measured_fraction_theta_full   0.987 
_refine_diff_density_max    0.404 
_refine_diff_density_min   -0.430 
_refine_diff_density_rms    0.056 

#===END
